# Supplementary material for: A comprehensive multi-omics analysis reveals unique signatures to predict Alzheimer’s disease
Source: Front Bioinform. 2024 Jun 19;4:1390607. doi: 10.3389/fbinf.2024.1390607 (PMC11219798; doi:10.3389/fbinf.2024.1390607)
Supplement: Supplementary file 1 [file Table1.XLSX]

## Sheet: Loadings
Feature_ID	importance	block	comp	ensembl_gene_id	hgnc_symbol	chromosome_name	start_position	end_position
tau_12E8_s262	-0.862148	proteomics	1
cg06965373	-0.575687	met	2		TMEM133	11	100862794	100862794
rs11010743	0.521889	snp	1			10	36919907	36919907
MLF2_2	0.487273	proteomics	2	ENSG00000089693	MLF2	12	6857170	6876641
ENSG00000111181.8	-0.470602	rna	1	ENSG00000111181	SLC6A12	12	299243	323736
cg25942596	-0.43113	met	1			15	82355828	82355828
rs2903011	-0.429239	snp	1			20	56745524	56745524
CBX1_2	0.422973	proteomics	2	ENSG00000108468	CBX1	17	46147414	46178883
rs4689278	-0.418192	snp	1	ENSG00000173040	EVC2	4	5690902	5690902
cg02355304	-0.359705	met	2		MIR589	7	5536984	5536984
TPRG1L_1	-0.35942	proteomics	1	ENSG00000158109	TPRG1L	1	3541566	3546691
rs16827689	-0.35585	snp	2			2	148453079	148453079
tau_PHF1_s404	-0.347699	proteomics	2
ENSG00000196559.2	0.346483	rna	2	ENSG00000196559	LINC00610	11	36290834	36294909
rs3849851	0.342654	snp	2	ENSG00000225885		8	119309329	119309329
rs3849851	0.342654	snp	2	ENSG00000177570	SAMD12	8	119309329	119309329
cg05722931	-0.336835	met	2			5	169008622	169008622
PTMS_1	-0.333288	proteomics	1	ENSG00000159335	PTMS	12	6874682	6880116
cg15708019	0.322354	met	1		WDR19	4	39183869	39183869
rs1442343	-0.317126	snp	1	ENSG00000101596	SMCHD1	18	2758137	2758137
rs1442343	-0.317126	snp	1	ENSG00000266049		18	2758137	2758137
cg15995695	-0.305404	met	1		C1ORF125	1	179334675	179334675
cg03560424	-0.303114	met	2			16	891605	891605
ENSG00000260456.1	0.302386	rna	2	ENSG00000260456	C16orf95	16	87117168	87351022
ENSG00000204241.3	0.301453	rna	2	ENSG00000204241		11	133902167	133916744
ENSG00000142949.12	0.296865	rna	1	ENSG00000142949	PTPRF	1	43990858	44089343
ENSG00000173588.9	0.295368	rna	1	ENSG00000173588	CCDC41	12	94700225	94853764
GFAP_1	0.292668	proteomics	2	ENSG00000131095	GFAP	17	42982376	42994305
ENSG00000232110.2	0.290878	rna	2	ENSG00000232110		10	91043522	91051882
COX7B_2	-0.29001	proteomics	2	ENSG00000131174	COX7B	X	77154935	77162870
COX7B_2	-0.29001	proteomics	2	ENSG00000269083	COX7B	HG1426_PATCH	77160392	77168327
ENSG00000204334.7	0.286603	rna	2	ENSG00000204334	ERICH2	2	171640296	171655481
cg26824091	-0.285548	met	1		GLO1	6	38670437	38670437
ENSG00000166863.7	0.284687	rna	1	ENSG00000166863	TAC3	12	57403784	57422667
rs4273072	0.281787	snp	2			17	3111798	3111798
cg07571734	-0.280987	met	1		PRKAG2	7	151479894	151479894
cg00780426	-0.277528	met	1			6	27838209	27838209
rs10438436	-0.271639	snp	1	ENSG00000196391	ZNF774	15	90908781	90908781
GFAP_2	0.262043	proteomics	2	ENSG00000131095	GFAP	17	42982376	42994305
cg06723829	-0.260561	met	1		LGR6	1	202186981	202186981
rs1928955	-0.255288	snp	2			13	66817322	66817322
cg04497390	-0.250759	met	2		RNF213	17	78327823	78327823
ENSG00000196517.7	-0.249334	rna	1	ENSG00000196517	SLC6A9	1	44457172	44497139
ENSG00000133640.13	-0.248563	rna	2	ENSG00000133640	LRRIQ1	12	85430092	85657002
rs3823529	0.244106	snp	2	ENSG00000130226	DPP6	7	154658504	154658504
ENSG00000196812.4	0.242745	rna	2	ENSG00000196812	ZSCAN16	6	28092338	28097860
ENSG00000254858.2	0.2423	rna	1	ENSG00000254858	MPV17L2	19	18303992	18307758
ENSG00000129467.9	-0.23899	rna	2	ENSG00000129467	ADCY4	14	24787555	24804299
rs17529042	-0.236397	snp	2	ENSG00000239922		3	147703442	147703442
ENSG00000251580.1	0.230981	rna	2	ENSG00000251580		4	6672452	6675557
cg24765079	-0.230261	met	1		CDH1	16	68772430	68772430
ENSG00000145088.4	0.228696	rna	2	ENSG00000145088	EAF2	3	121554030	121605373
cg08580836	-0.228649	met	1		ZNF300	5	150284448	150284448
ENSG00000120903.5	0.226209	rna	1	ENSG00000120903	CHRNA2	8	27317279	27337400
rs12080578	-0.225468	snp	2	ENSG00000197721	CR1L	1	207820612	207820612
cg17448335	0.22503	met	1		CRHBP	5	76249776	76249776
rs8023607	0.219224	snp	1			15	62121608	62121608
ENSG00000186281.8	0.21379	rna	2	ENSG00000186281	GPAT2	2	96687694	96705199
ENSG00000107623.3	0.212029	rna	1	ENSG00000107623	GDF10	10	48425815	48438976
cg08826839	-0.208808	met	2		FAP	2	163100125	163100125
cg14036226	-0.205196	met	2		PKN3	9	131464506	131464506
ENSG00000087076.3	0.203136	rna	2	ENSG00000087076	HSD17B14	19	49316274	49339935
UGT8_2	0.201343	proteomics	2	ENSG00000174607	UGT8	4	115519611	115599380
rs6075630	0.199074	snp	2	ENSG00000089101	C20orf26	20	20150027	20150027
ENSG00000155980.6	-0.198407	rna	1	ENSG00000155980	KIF5A	12	57943781	57980415
rs2840331	0.198374	snp	2	ENSG00000162551	ALPL	1	21861656	21861656
ENSG00000171121.12	-0.194733	rna	1	ENSG00000171121	KCNMB3	3	178957530	178984790
ENSG00000153822.9	-0.192743	rna	1	ENSG00000153822	KCNJ16	17	68049570	68131749
ENSG00000138670.11	0.191227	rna	1	ENSG00000138670	RASGEF1B	4	82347547	82965397
tau_12E8	-0.185436	proteomics	2
ENSG00000163827.8	0.185069	rna	1	ENSG00000163827	LRRC2	3	46556913	46621589
rs2856320	-0.182964	snp	2	ENSG00000139083	ETV6	12	11852495	11852495
UQCR10_2	-0.180477	proteomics	2	ENSG00000184076	UQCR10	22	30163358	30166402
cg22970357	-0.179724	met	1		EN1	2	119600408	119600408
rs1955282	0.17831	snp	2	ENSG00000174473	GALNTL6	4	173213263	173213263
ENSG00000267488.1	0.175137	rna	1	ENSG00000267488		17	34510615	34523870
cg19309009	-0.17325	met	2		MARK4	19	45753569	45753569
ENSG00000132024.13	0.166499	rna	2	ENSG00000132024	CC2D1A	19	14017014	14041692
rs7575137	0.163862	snp	2	ENSG00000171094	ALK	2	30074066	30074066
rs7575137	0.163862	snp	2	LRG_488		2	30074066	30074066
cg00005543	0.159455	met	1		TCTE3	6	170151632	170151632
cg10819420	-0.158868	met	2		GBX2	2	237074360	237074360
rs491938	-0.156806	snp	2			12	5199149	5199149
ENSG00000006047.8	0.15649	rna	1	ENSG00000006047	YBX2	17	7191571	7197934
STXBP1_5	-0.155738	proteomics	2	ENSG00000136854	STXBP1	9	130374544	130457460
rs8076343	0.15552	snp	1			17	36981872	36981872
ENSG00000241990.1	0.155173	rna	2	ENSG00000241990		22	46449585	46453090
ENSG00000224281.3	0.151566	rna	2	ENSG00000224281	SLC25A5-AS1	X	118599997	118603061
GRB2_2	0.151463	proteomics	2	ENSG00000177885	GRB2	17	73314157	73401790
rs17067250	-0.143808	snp	2			5	166025196	166025196
cg00252781	-0.142381	met	1		C1ORF125	1	179334658	179334658
ENSG00000168280.12	0.137851	rna	2	ENSG00000168280	KIF5C	2	149632819	149883273
cg05605052	-0.136457	met	2		RPSAP58	19	23945659	23945659
rs17210350	-0.133112	snp	2			11	85994238	85994238
rs8013913	0.128754	snp	1			14	99086165	99086165
cg21316470	0.128308	met	2		TPM1	15	63340581	63340581
rs306713	0.126299	snp	2	ENSG00000234223		7	79895883	79895883
ENSG00000134574.7	0.126018	rna	2	ENSG00000134574	DDB2	11	47236493	47260767
ENSG00000235501.1	-0.126007	rna	1	ENSG00000235501		1	95393122	95428826
ENSG00000215039.2	0.125968	rna	1	ENSG00000215039	CD27-AS1	12	6548167	6560733
cg01334437	0.125668	met	2		LYPLA1	8	55014655	55014655
rs7313474	-0.124741	snp	2	ENSG00000258216		12	90380389	90380389
rs7723981	-0.123974	snp	1			5	40404912	40404912
cg21965843	0.122314	met	1		FAM98A	2	33824371	33824371
rs12230722	-0.118477	snp	1			12	95956778	95956778
ENSG00000214226.4	0.11828	rna	2	ENSG00000214226	C17orf67	17	54869274	54916134
APOD_1	0.116683	proteomics	2	ENSG00000189058	APOD	3	195295573	195311076
cg25845331	0.11475	met	1		CASP9	1	15851274	15851274
LDHB_1	0.113941	proteomics	2	ENSG00000111716	LDHB	12	21788276	21910791
rs870908	-0.113554	snp	2			2	209814683	209814683
cg20466895	-0.112281	met	1			7	83319354	83319354
ENSG00000005961.13	0.108075	rna	2	ENSG00000005961	ITGA2B	17	42449548	42466873
cg09051837	-0.105608	met	2			6	28073389	28073389
rs1125432	-0.105493	snp	2			10	33722748	33722748
cg17430393	-0.105364	met	2		VSNL1	2	17722068	17722068
rs9637846	0.105341	snp	1	ENSG00000253925		5	167589814	167589814
rs9637846	0.105341	snp	1	ENSG00000145934	TENM2	5	167589814	167589814
rs12123330	-0.099891	snp	1			1	4227464	4227464
rs7116897	0.0970688	snp	1	ENSG00000165973	NELL1	11	20930997	20930997
cg07133629	-0.095081	met	1			16	34791202	34791202
rs8112377	-0.0941326	snp	2	ENSG00000105392	CRX	19	48326378	48326378
rs16950210	0.0925965	snp	1	ENSG00000137834	SMAD6	15	67057060	67057060
ENSG00000119403.9	-0.0893205	rna	1	ENSG00000119403	PHF19	9	123617977	123639606
ENSG00000198270.6	0.0881582	rna	1	ENSG00000198270	TMEM116	12	112369086	112450970
tau_AT100_t217	-0.087617	proteomics	1
NDUFV1_1	-0.0873111	proteomics	2	ENSG00000167792	NDUFV1	11	67374323	67380006
rs4764043	0.0872888	snp	1	ENSG00000273079	GRIN2B	12	14115482	14115482
ENSG00000235398.1	0.0836168	rna	2	ENSG00000235398	LINC00623	1	144275918	144341756
cg26339504	0.0821759	met	2		VAX1	10	118897859	118897859
cg13974798	0.0812385	met	2		TEK	9	27147022	27147022
ENSG00000152926.9	0.0809564	rna	1	ENSG00000152926	ZNF117	7	64432154	64467062
FYN_3	0.0806679	proteomics	2	ENSG00000010810	FYN	6	111981535	112194655
RPL35_1	0.0803114	proteomics	2	ENSG00000136942	RPL35	9	127620159	127624260
cg00333255	-0.0801484	met	2		RPSAP58	19	23945903	23945903
rs1939627	-0.079914	snp	1	ENSG00000255246		11	82347495	82347495
rs1939627	-0.079914	snp	1	ENSG00000245832		11	82347495	82347495
cg09260640	0.0759201	met	1		ZNF419	19	57999177	57999177
rs1992245	-0.0752286	snp	2			10	92899856	92899856
ENSG00000224420.2	-0.0722731	rna	2	ENSG00000224420	ADM5	19	50191921	50193832
CLU_1	-0.0722178	proteomics	1	ENSG00000120885	CLU	8	27454434	27472548
cg03553910	-0.0700937	met	2		BTN2A1	6	26457928	26457928
cg00903998	0.0693994	met	2		ESRRG	1	216897293	216897293
rs7921121	0.069268	snp	1	ENSG00000151468	CCDC3	10	13049885	13049885
cg02049405	-0.0685137	met	1			6	30095265	30095265
ELMO1_1	0.0677273	proteomics	2	ENSG00000155849	ELMO1	7	36893961	37488852
cg03646327	-0.0670769	met	2			16	88509768	88509768
cg26151310	-0.0658258	met	2		HLTF	3	148803905	148803905
cg17436861	0.0655233	met	2		DBN1	5	176900842	176900842
ENSG00000186364.6	0.0624411	rna	2	ENSG00000186364	NUDT17	1	145586115	145589439
ch.3.1045756F	-0.0623475	met	2		USP19	3	49148793	49148793
HSPA8_1	0.0615113	proteomics	2	ENSG00000109971	HSPA8	11	122928197	122933938
rs6070015	0.06131	snp	1	ENSG00000101144	BMP7	20	55758655	55758655
rs9888948	-0.060315	snp	1	ENSG00000262801		16	13392581	13392581
ENSG00000242142.1	-0.060228	rna	2	ENSG00000242142	SERBP1P3	3	53098299	53099107
rs6975902	-0.0597268	snp	1	ENSG00000219545	RPA3-AS1	7	7964238	7964238
CLU_2	-0.0595418	proteomics	1	ENSG00000120885	CLU	8	27454434	27472548
PLP1_1	0.0595066	proteomics	2	ENSG00000123560	PLP1	X	103028647	103047548
cg08506260	0.0553515	met	1		MIAT	22	27053195	27053195
ENSG00000261098.1	0.0553079	rna	1	ENSG00000261098		11	107182858	107186997
BIN1_4	-0.0544019	proteomics	2	ENSG00000136717	BIN1	2	127805603	127864931
rs844823	0.0514205	snp	1			20	23082662	23082662
cg27544015	0.0505597	met	1			7	66120042	66120042
cg25837909	-0.0500076	met	2		APH1B	15	63570396	63570396
cg10177647	0.0494723	met	1		FTSJD1	16	71323317	71323317
rs4793031	-0.0492145	snp	2			17	41868311	41868311
ENSG00000165092.8	-0.0482544	rna	2	ENSG00000165092	ALDH1A1	9	75515578	75695358
RPL35A_2	0.0473194	proteomics	2	ENSG00000182899	RPL35A	3	197676858	197683481
cg19053239	0.0470792	met	1		KIF5C	2	149645394	149645394
rs1327860	0.0428297	snp	1			10	10732112	10732112
BIN1_5	-0.0405525	proteomics	2	ENSG00000136717	BIN1	2	127805603	127864931
SPP1_1	0.0374607	proteomics	2	ENSG00000118785	SPP1	4	88896819	88904562
cg15488122	-0.0363298	met	1		GPR4	19	46105590	46105590
ENSG00000225792.1	-0.0357516	rna	1	ENSG00000225792		7	26411764	26416321
ENSG00000258240.1	0.0335092	rna	1	ENSG00000258240		12	111389487	111395616
cg03222990	-0.0332979	met	1			1	200269009	200269009
ENSG00000241728.1	-0.0306198	rna	1	ENSG00000241728		21	45748827	45750104
ENSG00000231768.1	-0.030207	rna	1	ENSG00000231768		1	234663637	234667525
ENSG00000239617.1	0.0294843	rna	1	ENSG00000239617		12	49297201	49297596
cg20039944	0.029324	met	1		TRIAP1	12	120884114	120884114
rs1544850	-0.0287147	snp	2	ENSG00000271955		2	60167206	60167206
ENSG00000172493.16	0.0286171	rna	2	ENSG00000172493	AFF1	4	87856154	88062206
ENSG00000162695.6	0.0283438	rna	1	ENSG00000162695	SLC30A7	1	101361632	101447309
SNAP25_7	-0.0281118	proteomics	2	ENSG00000132639	SNAP25	20	10199478	10288066
rs2760386	-0.0274658	snp	1	ENSG00000235097	LINC00330	13	45379502	45379502
NCL_1	0.0253801	proteomics	2	ENSG00000115053	NCL	2	232318242	232348352
rs514835	0.0247846	snp	2			11	102906516	102906516
APOD_2	0.0244713	proteomics	2	ENSG00000189058	APOD	3	195295573	195311076
rs1883949	-0.0243765	snp	1	ENSG00000230990		20	11257383	11257383
ENSG00000031691.5	0.023131	rna	2	ENSG00000031691	CENPQ	6	49431091	49460820
ENSG00000249751.1	-0.0225068	rna	2	ENSG00000249751	ECSCR	5	138784245	138842328
ENSG00000132031.8	-0.0212263	rna	2	ENSG00000132031	MATN3	2	20191872	20212455
rs10975044	0.021081	snp	1	ENSG00000107014	RLN2	9	5302095	5302095
rs10118347	0.0209814	snp	1			9	32870406	32870406
ENSG00000233937.2	0.0197652	rna	2	ENSG00000233937		5	180673523	180699168
rs6059013	-0.0194302	snp	2			20	31593868	31593868
ENSG00000229689.1	0.0187724	rna	1	ENSG00000229689		2	96191093	96198153
ENSG00000187775.11	0.0184139	rna	2	ENSG00000187775	DNAH17	17	76419778	76573476
cg04881814	0.0181921	met	2		CA10	17	50236572	50236572
rs16898286	-0.0174566	snp	2			8	101371613	101371613
ENSG00000161791.9	-0.0154474	rna	1	ENSG00000161791	FMNL3	12	50031724	50101948
PLP1_2	0.0133473	proteomics	2	ENSG00000123560	PLP1	X	103028647	103047548
rs4455277	-0.0131186	snp	1	ENSG00000180611	MB21D2	3	192614308	192614308
cg24362726	-0.00886121	met	1		SCLT1	4	130013618	130013618
rs369651	-0.00796721	snp	2			3	9012903	9012903
cg09178384	-0.00745751	met	2		SH3RF1	4	170193375	170193375
rs2034535	-0.00510102	snp	2	ENSG00000251567		4	137116996	137116996
cg06860864	-0.00408124	met	1			6	26552172	26552172
CBX1_1	0.00199155	proteomics	2	ENSG00000108468	CBX1	17	46147414	46178883
cg17333036	0.0014272	met	1		UBE2D2	5	138942208	138942208
AMPD2_2	0.000660344	proteomics	2	ENSG00000116337	AMPD2	1	110158726	110174673
rs6674964	0.000306014	snp	2			1	19154065	19154065
